# Supplementary material for: The reading difficulties in Chinese for individuals with attention deficit hyperactivity disorder: the role of executive function deficits
Source: PeerJ. 2025 Jul 9;13:e19679. doi: 10.7717/peerj.19679 (PMC12255239; doi:10.7717/peerj.19679)
Supplement: Supplemental Information 1 — Each row corresponds to an individual participant. [file peerj-13-19679-s001.xlsx]

## Sheet: ADHD+RD
Group	Age	Gender	WISC	VWM(0-back)	VWM(1-back)	VWM(2-back)	VSWM	Go/No-go	DCCC Total	DCCC1	DCCC2	DCCC3	DCCC4	DCCC5	DCCC6	DCCC7	DCCC8	SNAP-IV Total	IA	IH	ODD
1	11	1	105	1	0.935484	0.875	0.904762	0.963636	178	20	17	27	35	18	28	16	17	32	20	12	0
1	9	2	112	1	1	0.875	0.952381	0.945455	163	17	21	31	20	17	24	15	18	45	18	20	7
1	12	1	103	1	1	0.9375	0.880952	0.945455	139	13	14	21	24	14	20	15	18	26	12	5	9
1	12	1	107	1	1	0.875	0.880952	0.951515	178	21	18	25	27	20	26	20	21	28	16	7	5
1	10	2	96	1	0.967742	0.90625	0.904762	0.993939	155	18	14	25	24	15	26	15	18	43	17	14	12
1	9	1	101	1	1	0.8125	0.857143	0.987879	121	18	15	20	15	8	19	14	12	28	12	9	7
1	10	1	97	1	1	0.875	0.904762	0.969697	224	18	22	34	32	26	32	29	31	63	22	17	24
1	9	1	104	1	0.903226	0.90625	0.880952	0.987879	199	20	22	38	32	21	29	15	22	62	23	16	23
1	9	1	95	1	1	0.90625	0.928571	0.921212	144	17	13	25	23	8	26	15	17	41	18	15	8
1	8	1	106	0.933333	1	0.875	0.880952	0.933333	118	22	9	16	24	7	23	8	9	13	7	4	2
1	8	1	92	0.966667	0.83871	0.84375	0.809524	0.963636	179	22	20	28	25	20	25	15	24	37	17	12	8
1	8	2	93	1	0.83871	0.75	0.785714	0.957576	191	30	17	28	26	15	29	23	23	25	17	5	3
1	11	1	95	1	0.967742	0.78125	0.785714	0.993939	192	22	20	34	22	22	29	19	24	35	18	10	7
1	9	1	116	0.966667	0.935484	0.65625	0.928571	0.969697	110	14	16	18	17	8	14	12	11	32	13	11	8
1	11	2	103	1	1	0.875	0.880952	0.975758	222	21	18	39	35	27	33	21	28	33	19	8	6
1	10	1	111	1	0.967742	0.8125	0.833333	0.963636	144	24	11	18	24	16	17	18	16	23	10	3	10
1	8	1	100	0.966667	1	0.8125	0.857143	0.969697	76	8	7	10	14	6	13	7	11	29	9	10	10
1	10	2	110	0.933333	1	0.90625	0.833333	0.975758	147	15	13	27	19	16	21	17	19	31	14	6	11
1	9	1	104	1	0.935484	0.78125	0.857143	0.927273	163	17	18	29	23	17	23	17	19	24	12	4	8
1	11	1	94	0.966667	0.967742	0.875	0.857143	0.993939	196	20	22	30	32	22	31	20	19	23	13	6	4
1	10	1	116	1	0.967742	0.9375	0.857143	0.975758	175	14	20	37	27	22	22	13	20	26	14	9	3
1	11	1	94	1	0.967742	0.875	0.952381	0.993939	192	18	21	31	32	19	27	23	21	49	20	19	10
1	11	1	110	1	1	0.96875	0.880952	0.963636	144	14	12	24	28	18	17	13	18	48	16	18	14
1	10	1	99	1	0.967742	0.84375	0.880952	0.921212	107	13	10	15	13	12	16	15	13	27	12	8	7
1	10	1	95	0.966667	0.967742	0.8125	0.904762	0.957576	96	10	7	15	12	8	17	11	16	33	15	8	10
1	11	1	113	1	1	0.78125	0.880952	0.963636	93	12	12	16	18	8	7	6	14	34	13	7	14
1	9	1	116	0.966667	0.935484	0.8125	0.833333	0.987879	163	13	18	28	27	20	20	17	20	26	15	5	6
1	9	1	93	1	1	0.8125	0.928571	0.957576	108	11	8	15	19	11	19	13	12	16	11	2	3
1	9	1	97	1	0.967742	0.9375	0.809524	0.987879	141	17	13	20	19	12	26	16	18	57	17	21	19
1	10	2	114	1	0.967742	0.90625	0.880952	0.957576	144	14	18	29	17	17	18	9	22	49	27	16	6
1	9	1	95	1	0.935484	0.875	0.952381	1	106	11	15	24	18	7	7	7	17	33	13	12	8
1	10	1	115	1	0.967742	0.84375	0.904762	0.963636	110	10	10	21	18	8	8	17	18	34	14	14	6
1	10	1	107	1	0.935484	0.90625	0.904762	0.981818	103	9	7	20	17	8	15	9	18	48	17	16	15
1	10	1	100	1	1	0.90625	0.904762	0.987879	104	13	11	16	14	8	14	9	19	41	16	17	8
1	9	1	101	1	0.967742	0.9375	0.880952	0.975758	117	15	12	18	12	14	16	11	19	38	18	14	6
1	10	1	104	1	0.967742	0.90625	0.880952	0.969697	111	16	13	10	12	14	17	12	17	37	17	10	10
1	10	2	113	1	0.935484	0.875	0.880952	0.975758	110	8	16	15	13	15	13	12	18	39	20	15	4
1	11	1	108	1	0.967742	0.8125	0.904762	0.981818	115	10	12	14	18	15	16	11	19	45	21	15	9
2	9	2	105	1	1	0.875	0.785714	0.993939	146	19	13	25	17	15	25	10	22	32	20	7	5
2	11	1	104	0.966667	1	0.90625	0.833333	0.975758	191	21	26	37	31	9	23	19	25	50	21	19	10
2	10	1	100	0.866667	0.612903	0.78125	0.785714	0.951515	200	29	20	32	30	18	26	21	24	58	26	18	14
2	9	2	102	1	0.967742	0.78125	0.690476	0.963636	176	25	18	34	21	19	24	17	18	29	12	7	10
2	8	2	112	1	0.741935	0.75	0.761905	0.993939	212	33	25	36	30	22	24	19	23	50	19	18	13
2	10	1	102	1	0.935484	0.84375	0.666667	0.969697	211	21	25	35	32	25	30	15	28	23	16	3	4
2	11	1	94	1	0.741935	0.84375	0.761905	0.939394	182	24	21	33	21	21	20	18	24	51	16	18	17
2	9	1	105	1	1	0.9375	0.833333	1	181	19	20	30	30	16	28	19	19	29	16	8	5
2	9	1	94	1	1	0.59375	0.714286	0.915152	233	29	24	39	33	26	32	24	26	46	22	12	12
2	12	1	97	1	0.83871	0.78125	0.833333	0.909091	164	25	14	31	20	18	19	15	22	14	11	1	2
2	9	1	114	0.966667	0.709677	0.875	0.690476	0.969697	171	21	19	26	26	21	26	15	17	52	23	14	15
2	8	1	98	1	0.83871	0.75	0.666667	0.969697	145	21	12	19	22	12	23	17	19	21	9	8	4
2	8	1	99	0.966667	0.935484	0.65625	0.52381	0.909091	194	27	19	37	25	19	27	18	22	29	18	8	3
2	10	2	104	1	0.967742	0.8125	0.738095	0.969697	179	24	22	27	26	15	24	15	26	11	6	2	3
2	12	1	102	0.966667	0.83871	0.78125	0.785714	0.842424	176	26	18	28	25	23	20	16	20	42	15	12	15
2	11	1	106	0.966667	1	1	0.857143	0.951515	200	28	23	31	29	21	24	18	26	52	24	12	16
2	9	1	90	1	1	0.875	0.52381	0.963636	167	19	16	27	27	13	23	21	21	48	14	20	14
2	9	1	116	0.966667	0.806452	0.6875	0.785714	0.963636	179	28	26	25	26	16	22	16	20	33	16	10	7
2	9	1	106	0.933333	0.83871	0.78125	0.761905	0.927273	205	27	28	33	35	18	28	17	19	63	23	26	14
2	9	1	111	0.833333	0.774194	0.75	0.809524	0.89697	230	34	24	38	33	20	32	26	23	35	13	15	7
2	10	1	91	0.966667	0.967742	0.90625	0.785714	0.927273	192	23	22	29	30	16	24	21	27	41	19	12	10
2	10	1	114	1	0.935484	0.84375	0.761905	0.915152	130	15	12	22	24	12	17	11	17	35	19	3	13
2	10	1	95	1	1	0.9375	0.857143	0.945455	213	20	21	40	26	24	30	26	26	41	15	16	10
2	9	1	93	0.966667	0.645161	0.8125	0.619048	0.927273	206	27	24	32	33	19	30	21	20	58	18	22	18
2	10	1	116	0.933333	0.741935	0.6875	0.714286	0.884848	200	25	23	33	26	20	28	23	22	52	19	20	13
2	8	1	109	1	0.806452	0.8125	0.928571	0.945455	161	22	15	22	27	19	22	17	17	29	12	10	7
2	10	1	93	0.966667	1	0.78125	0.666667	0.969697	147	20	13	23	16	14	22	24	15	31	12	9	10
2	10	1	100	1	0.935484	0.8125	0.714286	0.884848	184	17	18	31	29	23	27	17	22	23	13	8	2
2	9	1	95	1	0.774194	0.78125	0.690476	0.921212	209	27	20	36	30	24	27	18	27	27	13	8	6
2	11	1	109	1	1	0.71875	0.428571	0.993939	178	21	19	30	23	19	26	21	19	35	12	16	7
2	10	1	102	1	0.935484	0.78125	0.690476	0.878788	157	17	23	26	15	18	23	16	19	29	11	12	6
2	9	1	116	1	1	0.875	0.761905	0.90303	238	25	27	40	33	26	33	27	27	56	20	23	13
2	9	2	102	0.766667	0.709677	0.65625	0.5	0.818182	214	31	22	34	35	16	33	21	22	31	16	6	9
2	9	1	108	0.933333	0.967742	0.71875	0.738095	0.939394	124	11	13	22	20	10	19	14	15	39	12	14	13
2	9	2	90	0.966667	0.806452	0.8125	0.761905	0.963636	109	11	9	22	13	10	16	17	11	14	6	4	4
2	9	2	100	1	0.935484	0.78125	0.761905	0.969697	186	22	19	32	25	22	23	17	26	39	16	14	9
2	11	1	116	1	0.903226	0.75	0.761905	0.933333	179	23	20	31	21	19	26	21	18	40	20	12	8
2	9	1	107	0.933333	0.677419	0.6875	0.738095	0.866667	186	26	23	27	22	26	25	19	18	29	13	8	8
1	9	1	98	1	0.97	0.90625	0.904762	0.981818	127	17	14	19	13	15	17	12	20	40	18	11	11
1	10	1	109	0.9	0.84	0.84375	0.880952	0.939394	121	18	15	11	13	15	18	13	18	42	21	16	5
1	11	1	107	1	1	0.8125	0.928571	0.957576	120	10	18	16	14	16	14	13	19	48	22	16	10
1	10	1	98	1	1	0.875	0.880952	0.945455	125	12	14	15	19	16	17	12	20	40	17	16	7
1	10	1	109	1	0.9	0.90625	0.809524	0.987879	168	25	20	29	18	16	21	18	21	10	6	3	1
1	10	2	93	1	1	0.90625	0.785714	0.963636	138	16	12	26	22	7	25	14	16	34	16	11	7
1	11	1	109	0.93	1	0.875	0.785714	0.987879	112	21	8	17	23	6	22	7	8	22	16	4	2
1	10	1	96	0.97	0.81	0.84375	0.928571	0.957576	171	21	19	27	24	19	24	14	23	32	17	9	6
1	10	1	101	1	0.84	0.75	0.857143	0.975758	183	29	16	27	25	14	28	22	22	29	12	10	7
1	11	2	92	1	0.97	0.78125	0.904762	0.987879	184	21	19	33	21	21	28	18	23	43	13	14	16
1	10	1	96	0.97	0.94	0.65625	0.833333	0.975758	102	13	15	17	16	7	13	11	10	30	18	7	5
1	9	1	94	1	1	0.84375	0.857143	0.981818	130	17	11	21	19	13	21	11	17	20	9	2	9
1	10	1	101	1	1	0.875	0.904762	0.969697	224	30	17	38	34	26	32	20	27	26	8	9	9
1	11	1	108	1	0.97	0.8125	0.833333	0.957576	136	23	10	17	23	15	16	17	15	28	13	5	10
1	11	2	98	1	1	0.8125	0.857143	0.969697	68	7	6	9	13	5	12	6	10	21	11	3	7
1	10	1	114	1	1	0.90625	0.857143	0.963636	149	14	12	26	28	15	20	16	18	20	12	5	3
1	11	1	110	1	0.94	0.78125	0.857143	0.957576	155	16	17	28	22	16	22	16	18	23	13	8	2
1	12	1	95	1	0.97	0.875	0.833333	0.957576	188	19	21	29	31	21	30	19	18	46	19	18	9
1	10	2	91	1	0.97	0.9375	0.880952	0.945455	167	13	19	36	26	21	21	12	19	45	15	17	13
1	10	1	96	0.93	0.97	0.875	0.880952	0.993939	189	20	20	30	31	18	28	22	20	63	23	17	23
1	10	1	90	0.97	1	0.9375	0.904762	0.981818	151	26	11	23	27	17	18	12	17	35	21	13	1
1	9	1	96	1	0.97	0.84375	0.880952	0.987879	104	15	9	14	12	11	17	14	12	51	24	15	12
1	11	1	111	1	0.97	0.78125	0.833333	0.969697	95	12	6	14	11	7	18	10	17	48	19	21	8
1	10	1	102	0.97	1	0.875	0.928571	0.993939	166	16	22	25	19	19	28	17	20	29	13	6	10
1	11	1	115	1	0.94	0.9375	0.809524	0.939394	173	19	23	32	21	18	25	16	19	31	17	8	6
1	12	2	107	1	1	0.875	0.880952	0.975758	149	15	16	22	25	15	21	16	19	46	18	15	13
1	9	1	114	1	1	0.96875	0.952381	0.957576	188	23	20	26	28	21	27	21	22	34	14	13	7
1	10	1	113	0.97	0.97	0.875	0.904762	0.987879	162	17	16	26	25	16	27	16	19	31	13	10	8
1	10	1	103	0.93	1	0.8125	0.904762	0.945455	163	18	21	27	22	14	21	19	21	66	23	18	25
1	11	2	113	1	1	0.78125	0.904762	0.993939	120	17	17	21	14	7	18	15	11	63	22	17	24
1	10	1	113	0.97	0.94	0.8125	0.880952	0.969697	223	17	24	35	31	25	31	30	30	24	11	7	6
1	8	1	107	0.93	0.97	0.875	0.809524	0.933333	193	19	21	39	31	20	28	14	21	30	14	7	9
1	9	1	118	0.97	1	0.84375	0.97619	0.987879	98	14	11	15	19	9	8	7	15	31	12	6	13
1	11	1	108	1	1	0.875	0.880952	0.951515	183	25	20	29	28	21	21	18	21	25	14	4	7
1	8	1	96	1	0.84	0.90625	0.880952	0.933333	118	13	10	16	20	12	20	14	13	15	10	1	4
1	9	2	112	0.97	0.87	0.875	0.904762	0.951515	151	19	15	21	20	13	27	17	19	58	18	20	20
1	10	1	94	1	0.97	0.90625	0.833333	0.957576	154	16	20	30	18	18	19	10	23	52	28	17	7
1	8	1	100	1	0.94	0.84375	0.880952	0.981818	116	13	17	25	19	8	8	8	18	36	14	13	9
1	9	2	94	1	1	0.8125	0.857143	0.963636	120	12	12	22	19	9	9	18	19	37	15	15	7
1	11	1	108	0.97	1	0.875	0.904762	0.957576	113	11	9	21	18	9	16	10	19	51	18	17	16
1	9	1	102	0.93	0.97	0.96875	0.880952	0.969697	114	15	13	17	15	9	15	10	20	44	17	18	9
1	9	1	101	1	1	0.90625	0.928571	0.963636	176	24	21	33	21	20	20	17	20	41	19	15	7
2	9	1	94	0.97	1	0.875	0.880952	0.993939	144	16	17	22	21	19	20	16	13	29	16	8	5
2	10	1	114	1	0.94	0.84375	0.785714	0.927273	176	22	17	27	27	22	27	16	18	32	12	13	7
2	11	1	96	0.97	0.97	0.75	0.690476	0.933333	159	22	19	20	23	13	24	18	20	59	21	24	14
2	11	1	117	1	0.97	0.78125	0.761905	0.939394	147	15	25	22	17	16	19	16	17	34	17	7	10
2	11	2	104	0.97	0.97	0.65625	0.738095	0.945455	178	27	13	29	26	24	21	17	21	42	13	15	14
2	10	1	110	1	0.74	0.84375	0.761905	0.915152	160	18	13	25	22	20	25	18	19	17	7	5	5
2	11	2	112	0.97	1	0.65625	0.666667	0.921212	213	22	26	34	33	24	31	16	27	42	17	15	10
2	10	1	95	0.97	1	0.8125	0.761905	0.90303	182	25	22	32	20	20	21	19	23	43	21	13	9
2	10	1	99	1	0.9	0.78125	0.833333	0.90303	179	18	21	29	29	15	29	20	18	32	14	9	9
2	11	1	94	0.97	0.74	1	0.714286	0.945455	229	28	25	38	32	25	33	23	25	55	20	21	14
2	10	1	101	0.93	0.84	0.875	0.738095	0.927273	129	14	15	20	19	17	18	15	11	32	13	11	8
2	12	1	108	0.83	0.71	0.6875	0.690476	0.933333	169	20	20	25	25	20	25	18	16	34	13	10	11
2	9	2	90	0.97	0.84	0.78125	0.690476	0.945455	130	20	11	18	21	11	22	9	18	26	14	9	3
2	9	1	101	1	0.94	0.75	0.666667	0.951515	117	13	11	20	15	14	17	12	15	45	21	13	11
2	11	1	108	1	0.97	0.90625	0.52381	0.921212	173	25	17	27	24	22	19	20	19	11	10	0	1
2	10	1	104	0.97	0.84	0.84375	0.738095	0.945455	193	27	22	30	28	20	23	18	25	49	22	13	14
2	12	1	99	0.93	1	0.9375	0.761905	0.951515	149	18	15	26	26	12	22	10	20	18	8	7	3
2	11	1	98	1	1	0.78125	0.785714	0.933333	139	17	15	24	15	15	21	13	19	8	5	1	2
2	9	2	115	0.97	0.81	0.75	0.880952	0.884848	178	18	17	32	34	17	27	15	18	39	14	11	14
2	10	1	96	1	0.74	0.75	0.52381	0.909091	214	33	23	37	32	19	31	17	22	49	23	11	15
2	9	1	115	1	0.81	0.84375	0.785714	0.969697	130	15	12	22	24	12	17	11	17	45	13	19	13
2	11	2	107	1	1	0.84375	0.738095	0.866667	213	20	21	40	26	24	30	26	26	30	15	9	6
2	11	1	115	1	0.94	0.9375	0.809524	0.957576	206	27	24	32	33	19	30	21	20	60	22	25	13
2	10	1	92	1	0.77	0.59375	0.785714	0.878788	200	25	23	33	26	20	28	23	22	32	12	14	6
2	11	1	107	1	1	0.625	0.761905	0.975758	150	22	15	22	27	12	22	13	17	38	18	11	9
2	10	1	95	1	0.94	0.875	0.857143	0.993939	157	20	17	28	32	10	24	10	16	32	18	2	12
2	10	2	103	1	1	0.78125	0.619048	0.957576	204	30	21	31	31	17	27	22	25	35	21	8	6
2	9	1	95	1	0.71	0.875	0.714286	0.921212	159	18	16	23	22	18	25	18	19	53	22	20	11
2	10	2	103	0.97	0.97	0.75	0.738095	0.915152	216	34	26	35	31	21	25	20	24	61	27	19	15
2	10	1	110	0.9	0.87	0.65625	0.761905	0.939394	187	24	22	32	25	19	27	17	21	32	13	8	11
2	10	1	118	1	0.9	0.8125	0.666667	0.945455	141	21	14	23	26	11	21	9	16	53	20	19	14
2	11	1	103	0.97	0.74	0.78125	0.761905	0.933333	131	21	8	24	15	15	21	13	14	26	17	4	5
2	9	2	96	1	0.94	0.875	0.833333	0.957576	188	18	17	32	28	24	26	22	21	54	17	19	18
2	10	1	104	0.97	0.74	0.90625	0.714286	0.927273	211	28	19	37	29	25	26	19	28	30	17	9	4
2	11	1	116	1	1	0.78125	0.738095	0.927273	149	18	12	27	14	19	22	17	20	38	14	15	9
2	10	1	97	0.97	1	0.78125	0.690476	0.927273	240	26	26	41	32	27	32	28	28	55	17	21	17
2	11	1	96	0.97	0.9	0.78125	0.690476	0.945455	218	32	21	35	36	17	32	22	23	49	18	19	12
2	9	1	100	1	0.74	0.75	0.666667	0.939394	128	12	12	23	21	11	18	15	16	26	11	9	6
2	11	1	94	0.93	0.84	0.75	0.52381	0.939394	115	12	10	23	14	11	15	18	12	28	11	8	9
2	9	1	97	1	0.71	0.84375	0.738095	0.921212	194	23	20	33	26	23	24	18	27	20	12	7	1
2	9	1	105	1	0.84	0.84375	0.785714	0.939394	160	17	14	28	23	17	26	16	19	28	14	7	7
2	12	1	104	0.93	0.94	0.9375	0.857143	0.987879	160	17	14	28	23	17	26	16	19	38	13	17	8
