# Supplementary material for: The reading difficulties in Chinese for individuals with attention deficit hyperactivity disorder: the role of executive function deficits
Source: PeerJ. 2025 Jul 9;13:e19679. doi: 10.7717/peerj.19679 (PMC12255239; doi:10.7717/peerj.19679)
Supplement: Supplemental Information 2 — Detailed definitions and coding instructions for all variables used in the study. [file peerj-13-19679-s002.xlsx]

## Sheet: Sheet1
Variable	Code	Description
Group	1	ADHD
Group	2	ADHD+RD
Gender	1	Male
Gender	2	Female
DCCCC1		visual perception disorder
DCCCC2		auditory perception disorder
DCCCC3		meaning comprehension disorder
DCCCC4		writing disorder
DCCCC5		oral language disorder
DCCCC6		written expression disorder
DCCCC7		poor reading habits disorder
DCCCC8		inattention disorder
